# Supplementary material
Source: publisher figshare collection journal article supplement (https://rs.figshare.com/ndownloader/files/14561084)
Supplement: Supplementary file 1 [file 14561084]

Supplementary material for

**Evidence for non-colligative function of small cryoprotectants in a freeze-tolerant insect**

Jantina Toxopeus<sup>a\*</sup>, Vladimír Košťál<sup>b</sup> & Brent J. Sinclair<sup>a</sup>

<sup>a</sup>Department of Biology, University of Western Ontario, 1151 Richmond St N, London, ON, Canada, N6A 5B7

<sup>b</sup>Institute of Entomology, Biology Centre, Czech Academy of Sciences, Branišovská 1160/31, České Budějovice, Czech Republic, 370 05

\*Corresponding author; present address: Department of Integrative Biology, University of Colorado Denver, 1151 Arapahoe St, Denver, CO, USA, 80204

Emails: JT, [jantina.toxopeus@ucdenver.edu](mailto:jantina.toxopeus@ucdenver.edu); VK, [kostal@entu.cas.cz](mailto:kostal@entu.cas.cz); BJS, [bsincla7@uwo.ca](mailto:bsincla7@uwo.ca)

## *SI Methods*

To measure cryoprotectant concentrations in haemolymph samples from *Gryllus veletis*, we used the following spectrophotometric assays:

Glucose – We determined haemolymph glucose concentrations using the Glucose Assay Reagent (Sigma Aldrich, Mississauga, ON, Canada), according to manufacturer's instructions. Briefly, we diluted haemolymph samples by 1:50 to 1:1000 in Tris buffer (TB; 5 mM Tris, 137 mM NaCl, 2.7 mM KCl), vortexed to mix, incubated at 70 °C for 10 min, and centrifuged at 20,000 × g for 3 min. We added 10 µl of supernatant to 90 µl of Glucose Assay Reagent (Sigma Aldrich), incubated the reaction in flat-bottomed 96-well-plates for 20 min at room temperature (c. 22 °C), and measured absorbance in a microplate spectrophotometer (SpectraMax 340PC, Molecular Devices, Sunnydale, CA, USA) at 340 nm. We determined glucose concentration in each sample by comparison to a standard curve range of 0.16 to 0.01 mg/ml glucose diluted in TB.

Glycerol – We determined haemolymph glycerol concentrations using Free Glycerol Reagent (Sigma Aldrich), according to manufacturer's instructions [1]. Briefly, we diluted haemolymph samples by 1:50 to 1:1000 in 0.05 % Tween-20, and vortexed to mix. We added 30 µl of sample to 100 µl of Free Glycerol Reagent (Sigma Aldrich), incubated the reaction in flat-bottomed 96-well-plates for 15 min at room temperature, and measured absorbance at 540 nm. We determined glycerol concentration in each sample by comparison to a standard curve range of 0.5 mM to 0.031 mM glycerol diluted in 0.05 % Tween-20.

myo-Inositol – We determined haemolymph *myo*-inositol concentrations using the *myo*-Inositol Assay Kit (Megazyme, Bray, Ireland), scaled down from manufacturer's instructions. Briefly, we diluted haemolymph samples by 1:50 to 1:1000 in distilled deionised H<sub>2</sub>O (ddH<sub>2</sub>O), vortexed to mix, incubated at 70 °C for 10 min, and centrifuged at 20,000 × g for 3 min. We added 15 µl of solution A (hexokinase solution) to 20 µl of sample, and incubated the reaction at room temperature for 15 min. We then added 100 µl of solution B (inositol dehydrogenase/diaphorase solution), and incubated the reaction at room temperature for 10 min. We transferred 100 µl of this mixture into flat-bottomed 96-well-plates, and measured absorbance at 492 nm. We

determined *myo*-inositol concentration in each sample by comparison to a standard curve range of 0.25 to 0.016 mg/ml *myo*-inositol diluted in ddH<sub>2</sub>O.

Polyethylene glycol – We measured haemolymph polyethylene glycol (PEG) concentrations using a previously described assay [2]. Briefly, we diluted haemolymph samples 1:25 in ddH<sub>2</sub>O, and vortexed to mix. We added 500 µl of chloroform and 500 µl of ammonium ferrothiocyanate reagent (0.1 M FeCl<sub>3</sub>, 0.4 M NH<sub>4</sub>SCN) to 50 µl of sample in 1.7 ml microcentrifuge tubes. We mixed the sample vigorously on a benchtop shaker (700 rpm) for 30 min at room temperature, and centrifuged at 600 × g for 2 min. We transferred 100 µl of the lower chloroform layer into flat-bottomed 96-well-plates, and measured absorbance at 510 nm. We determined PEG concentration in each sample by comparison to a standard curve range of 1.25 to 0.078 mM PEG-8000 (Sigma Aldrich) diluted in ddH<sub>2</sub>O.

Proline – We measured haemolymph proline concentration using a previously described assay [3]. Briefly, we diluted haemolymph samples by 1:50 to 1:1000 in 40 % ethanol, and vortexed to mix. Samples were incubated at 4 °C overnight (18 to 24 h), and then centrifuged at 14,000 × g for 5 min. We added 40 µl of sample to 100 µl of ninhydrin solution [1 % (w/v) ninhydrin in 60 % acetic acid (v/v) and 20 % ethanol (v/v)], and incubated the reaction at 95 °C for 20 min. We centrifuged samples at 600 × g for 1 min, transferred 100 µl of supernatant into flat-bottomed 96-well-plates, and measured absorbance at 520 nm. We determined proline concentration in each sample by comparison to a standard curve range of 0.5 mM to 0.016 mM proline diluted in 40 % ethanol.

Trehalose – We measured haemolymph trehalose concentrations using a previously described assay [4]. Briefly, we diluted haemolymph samples by 1:50 to 1:1000 in Tris buffer (TB), vortexed to mix, incubated at 70 °C for 10 min, and centrifuged at 20,000 × g for 3 min. For each sample, we added 30 µl of trehalase stock [TS; 0.3 % (v/v) porcine trehalase enzyme (Sigma Alrich) in TB] to a 30 µl aliquot of supernatant to lyse trehalose into glucose monomers. We added 30 µl of TB to a second aliquot of supernatant. Samples were incubated at 37 °C overnight (18 to 24 h), centrifuged at 20,000 × g for 3 min, and processed using the Glucose Assay Reagent, as described above. We determined baseline glucose haemolymph concentration by comparing samples incubated in TB to a standard curve range of 0.16 to 0.1 mg/ml glucose

diluted in TB. We calculated trehalose haemolymph concentration by comparing samples incubated in 1:1 TB:TS to a standard curve range of 0.16 to 0.1 mg/ml trehalose diluted in 1:1 TB:TS, and subtracting the signal from baseline glucose haemolymph.

#### *SI References*

1. Crosthwaite JC, Sobek S, Lyons DB, Bernards MA, Sinclair BJ 2011 The overwintering physiology of the emerald ash borer, *Agrilus planipennis* Fairmaire (Coleoptera: Buprestidae). *J. Insect Physiol.* **57**, 166-173.
2. Nag A, Mitra G, Ghosh PC 1996 A colorimetric assay for estimation of polyethylene glycol and polyethylene glycolated protein using ammonium ferrothiocyanate. *Analytical Biochemistry.* **237**, 224-231.
3. Carillo P, Gibon Y. Protocol: extraction and determination of proline [https://www.researchgate.net/publication/211353600\\_PROTOCOL\\_Extraction\\_and\\_determination\\_of\\_proline2011](https://www.researchgate.net/publication/211353600_PROTOCOL_Extraction_and_determination_of_proline2011) [28 June 2018].
4. Tennessen JM, Barry WE, Cox J, Thummel CS 2014 Methods for studying metabolism in *Drosophila*. *Methods.* **68**, 105-115.

**Table S1. Generalised linear models testing the effect of elevated cryoprotectant concentrations on survival of freeze-tolerant (FT) and freeze-intolerant (FI) crickets and their fat body cells.** Separate models were run for each group (FI, FT-LLT, and FT-Lt) within each sample type (whole crickets, and fat body frozen *ex vivo*). Freeze-intolerant crickets were frozen to -8 °C for 1.5 h (FI); FT crickets were frozen to the LLT (-12 °C for 1.5 h; FT-LLT), or for the Lt (1 week at -8 °C; FT- Lt). Fat body from FI crickets was frozen to -8 °C for 10 min (FI); fat body from FT crickets was frozen to the cellular LLT (-16 °C for 10 min; FT-LLT), or for the cellular lethal time (24 h at -8 °C; FT- Lt). LLT, lower lethal temperature; Lt, lethal time. Significant effect of cryoprotectant on survival denoted by bold *P*-values.

| Sample<br>Cryoprotectant              | FI       |                  | FT-LLT   |              | FT-Lt    |              |
|---------------------------------------|----------|------------------|----------|--------------|----------|--------------|
|                                       | $\chi^2$ | <i>P</i>         | $\chi^2$ | <i>P</i>     | $\chi^2$ | <i>P</i>     |
| <b>Whole crickets</b>                 |          |                  |          |              |          |              |
| <i>myo</i> -Inositol                  | 0.000    | 1.000            | 0.847    | 0.397        | 0.007    | 0.994        |
| Proline                               | 0.000    | 1.000            | 0.899    | 0.369        | 2.558    | <b>0.011</b> |
| Trehalose                             | 0.000    | 1.000            | 3.162    | <b>0.002</b> | 1.922    | <b>0.045</b> |
| Combination <sup>a</sup>              | 0.000    | 1.000            | 1.913    | <b>0.045</b> | 2.516    | <b>0.013</b> |
| Glycerol                              | 0.002    | 0.998            | 3.237    | <b>0.001</b> | 2.391    | <b>0.017</b> |
| PEG                                   | 0.000    | 1.000            | 0.011    | 0.991        | 0.007    | 0.994        |
| Glucose                               | 0.000    | 1.000            | 0.305    | 0.761        | 0.008    | 0.994        |
| <b>Fat body frozen <i>ex vivo</i></b> |          |                  |          |              |          |              |
| <i>myo</i> -Inositol                  | 0.788    | 0.431            | 2.170    | <b>0.030</b> | 1.921    | <b>0.045</b> |
| Proline                               | 0.652    | 0.515            | 0.268    | 0.789        | 0.376    | 0.707        |
| Trehalose                             | 0.878    | 0.379            | 0.635    | 0.526        | 1.981    | <b>0.048</b> |
| Combination <sup>a</sup>              | 1.290    | 0.197            | 2.611    | <b>0.009</b> | 2.329    | <b>0.020</b> |
| Glycerol                              | 3.517    | <b>&lt;0.001</b> | 2.611    | <b>0.009</b> | 0.872    | 0.383        |
| PEG                                   | 0.901    | 0.368            | 0.322    | 0.747        | 0.856    | 0.392        |
| Glucose                               | 0.299    | 0.765            | 0.215    | 0.829        | 0.588    | 0.556        |

<sup>a</sup> ‘Combination’ is a combination of *myo*-inositol, proline, and trehalose.
